# Supplementary material for: SEEDING to enable sensitive electrochemical detection of biomarkers in undiluted biological samples
Source: Research Square preprint supplement (doi:10.21203/rs.3.rs-945043/v1), 2021-10-08
Supplement: Supplementary file 1 [file 3756e10b26d6e1a4a0ecb6c5.pdf]

## Supplementary Information

### SEEDING to enable sensitive electrochemical detection of biomarkers in undiluted biological samples

*Jonathan Sabaté del Río<sup>1</sup>, Hyun-Kyung Woo<sup>1,2</sup>, Juhee Park<sup>1</sup>, Hong Koo Ha<sup>3</sup>, Jae-Ryong Kim<sup>4</sup>, Yoon-Kyoung Cho<sup>1,2\*</sup>*

<sup>1</sup>Center for Soft and Living Matter, Institute for Basic Science (IBS), Ulsan, 44919 Republic of Korea; <sup>2</sup>Department of Biomedical Engineering, Ulsan National Institute of Science and Technology (UNIST), Ulsan, 44919 Republic of Korea; <sup>3</sup>Department of Urology, Pusan National University Hospital, Pusan National University School of Medicine, Busan 49241, Republic of Korea; <sup>4</sup>Department of Biochemistry and Molecular Biology, Smart-aging Convergence Research Center, College of Medicine, Yeungnam University, Daegu 42415, Republic of Korea;

\*Correspondence to: ykcho@unist.ac.kr (Y.-K.C.)

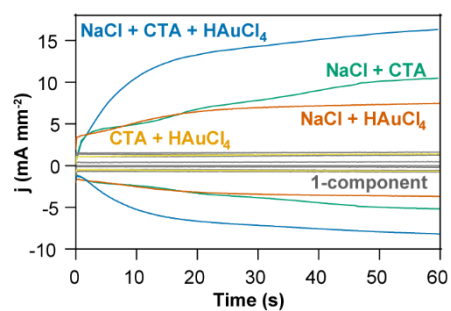

17

18 **Supplementary Fig. 1** | Typical chronoamperograms, showing both cathodic and  
 19 anodic currents, during the nanostructuring process conducted in photolithographic  
 20 gold electrodes in different control solutions (one-component controls are all greyed  
 21 out).

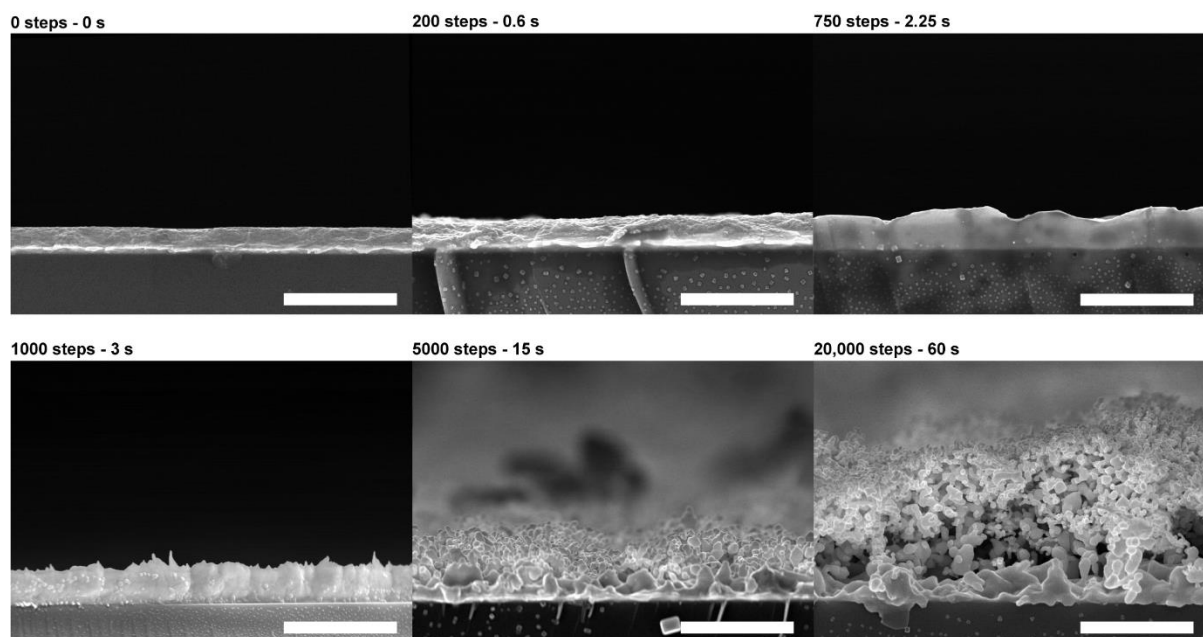

**Supplementary Fig. 2** | Scanning electron micrographs of cross-sections of nanostructured gold electrodes conducted by chronoamperometry after different numbers of voltage steps. Scale bar: 2  $\mu\text{m}$ .

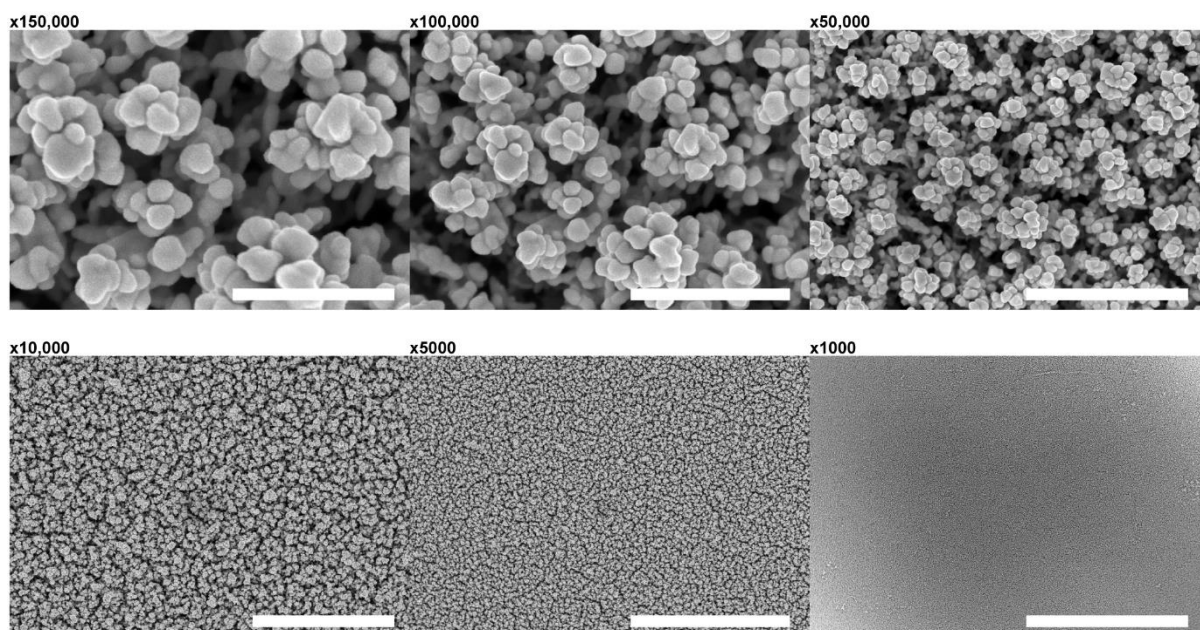

**Supplementary Fig. 3** | Scanning electron micrographs of nanostructured gold electrodes at different magnifications, displaying grain detail at higher magnifications and surface homogeneity at low magnifications (scale bars: from left to right, top to bottom: 300 nm, 500 nm, 1  $\mu$ m, 5  $\mu$ m, 10  $\mu$ m, and 50  $\mu$ m).

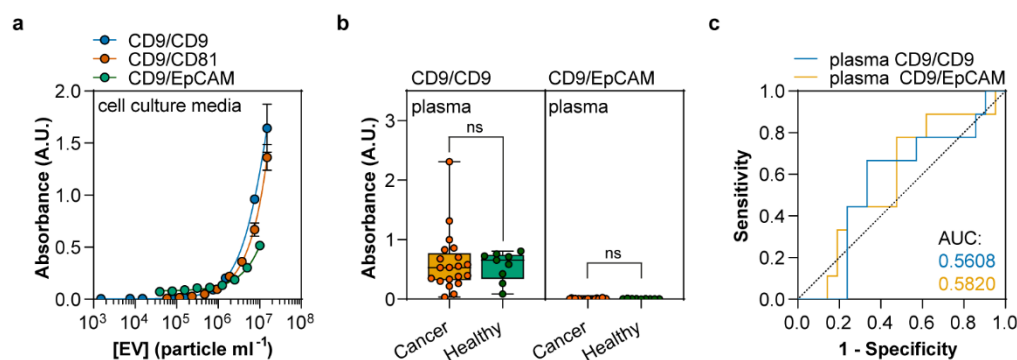

**Supplementary Fig. 4 |** Calibration plot for detection of CD9<sup>+</sup>, CD81<sup>+</sup> or EpCAM<sup>+</sup> on CD9-captured extracellular vesicles from cell culture media, representing absorbance (circles) vs. particle concentration in traditional ELISA (n = 4 wells). Error bars represent the standard deviation of the mean. **b**, Analysis of clinical human plasma samples using ELISA with different assay schemes, detection of CD9<sup>+</sup> or EpCAM<sup>+</sup> on CD9-captured extracellular vesicles (21 cancer samples and nine healthy samples with three technical replicates for each). The boxes extend from the 25<sup>th</sup> to 75<sup>th</sup> percentiles, the middle line is the median, and the whiskers extend from min to max values. **c**, Characteristic curve showing the classification ability (healthy, cancer) for the two employed assays on plasma clinical samples.

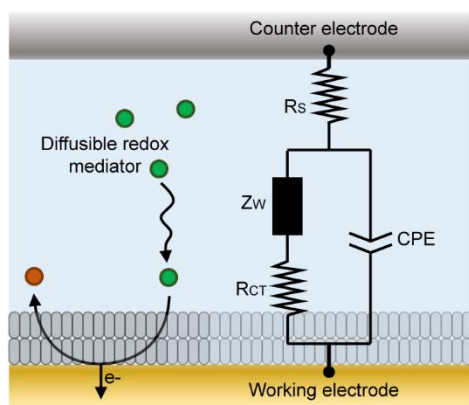

42

43 **Supplementary Fig. 5** | Nyquist equivalent circuit and schematic representation of

44 each element of the circuit.

45 **Supplementary table 1. Facet relative abundance in flat and NSG electrodes**

| Sample    | Facet relative abundance (%) |       |       |       | Crystallite size (nm) |
|-----------|------------------------------|-------|-------|-------|-----------------------|
|           | (111)                        | (200) | (220) | (311) |                       |
| Flat gold | 13                           | 10    | 72    | 5     | 19 ± 4                |
| NSG       | 17                           | 12    | 63    | 8     | 21 ± 4                |

46 **NSG:** Nanostructured and nanoporous gold

**Supplementary table 2. Other methods to generate high surface gold electrodes.**

| Method                        | Suitable for Photo-lithographic electrodes? | Acids, Toxic reagents or Solvents? | Fabrication throughput | Complexity | Time | Residues | Porosity / anti-biofouling | Ref. |
|-------------------------------|---------------------------------------------|------------------------------------|------------------------|------------|------|----------|----------------------------|------|
| EC etching                    | X                                           | ✓                                  | •                      | ••         | •••  | X        | ✓                          | 1, 2 |
| Template-free ED              | ✓                                           | X                                  | ••                     | ••         | •    | X        | X                          | 3    |
| Nanoporous filter template ED | ✓                                           | ✓                                  | •                      | •••        | ••   | X        | ✓                          | 4, 5 |
| Surfactant-based template ED  | ✓                                           | ✓                                  | ••                     | •••        | ••   | X        | X                          | 6    |
| EC roughening                 | X                                           | ✓                                  | ••                     | •          | •    | X        | X                          | 7    |
| Nanoparticles                 | ✓                                           | X                                  | ••                     | •          | •    | X        | X                          | 8    |
| PVD + chemical dealloying     | ✓                                           | ✓                                  | •••                    | •••        | •••  | ✓        | ✓                          | 9    |
| EC dealloying                 | ✓                                           | ✓                                  | •••                    | •••        | •••  | X        | ✓                          | 10   |
| ED and EC dealloying          | X                                           | ✓                                  | •                      | ••         | ••   | ✓        | ✓                          | 11   |
| SEEDING                       | ✓                                           | X                                  | ••                     | ••         | •    | X        | ✓                          |      |

**EC:** Electrochemical, **ED:** Electrodeposition, **PVD:** Physical vapor deposition (thermal evaporation or sputtering)

X: No, ✓: Yes, •: Low, ••: Middle, •••: High. The symbols are colored in **green** when the outcome is good/positive, **red** when is bad/negative, and **grey** when is fair.



## Supplementary References

1. Sukeri, A., Saravia, L. P. H., Bertotti, M. A facile electrochemical approach to fabricate a nanoporous gold film electrode and its electrocatalytic activity towards dissolved oxygen reduction. *Phys. Chem. Chem. Phys.* **17**, 28510-28514 (2015).
2. Deng, Y., Huang, W., Chen, X., Li, Z. Facile fabrication of nanoporous gold film electrodes. *Electrochem. commun.* **10**, 810-813 (2008).
3. Soleymani, L., Fang, Z., Sargent, E. H., Kelley, S. O. Programming the detection limits of biosensors through controlled nanostructuring. *Nat. Nanotechnol.* **4**, 844 (2009).
4. Zhang, X., Li, D., Bourgeois, L., Wang, H., Webley, P. A. Direct electrodeposition of porous gold nanowire arrays for biosensing applications. *Chemphyschem.* **10**, 436-441 (2009).
5. Bahari Mollamahale, Y., Ghorbani, M., Dolati, A., Hosseini, D. Electrodeposition of well-defined gold nanowires with uniform ends for developing 3D nanoelectrode ensembles with enhanced sensitivity. *Mater. Chem. Phys.* **213**, 67-75 (2018).
6. Lim, H., *et al.* A universal approach for the synthesis of mesoporous gold, palladium and platinum films for applications in electrocatalysis. *Nat. Protoc.* **15**, 2980-3008 (2020).
7. Arroyo-Currás, N., Scida, K., Ploense, K. L., Kippin, T. E., Plaxco, K. W. High Surface Area Electrodes Generated via Electrochemical Roughening Improve the Signaling of Electrochemical Aptamer-Based Biosensors. *Anal. Chem.* **89**, 12185-12191 (2017).
8. Young, S. L., Kellon, J. E., Hutchison, J. E. Small Gold Nanoparticles Interfaced to Electrodes through Molecular Linkers: A Platform to Enhance Electron Transfer and Increase Electrochemically Active Surface Area. *J. Am. Chem. Soc.* **138**, 13975-13984 (2016).
9. Rouya, E., Cattarin, S., Reed, M. L., Kelly, R. G., Zangari, G. Electrochemical Characterization of the Surface Area of Nanoporous Gold Films. *J. Electrochem. Soc.* **159**, K97-K102 (2012).
10. Lackmann, A., Baumer, M., Wittstock, G., Wittstock, A. Independent control over residual silver content of nanoporous gold by galvanodynamically controlled dealloying. *Nanoscale.* **10**, 17166-17173 (2018).

11. Jia, F., Yu, C., Ai, Z., Zhang, L. Fabrication of Nanoporous Gold Film Electrodes with Ultrahigh Surface Area and Electrochemical Activity. *Chem. Mater.* **19**, 3648-3653 (2007).
